# Supplementary material for: Extended Reduced-Dose Direct Oral Anticoagulants for Venous Thromboembolism in Patients with or without Cancer: A Systematic Review and Meta-Analysis
Source: Research Square preprint supplement (doi:10.21203/rs.3.rs-8066325/v1), 2025-11-11
Supplement: Supplementary file 1 [file d40b669d28fb2a537624996d.docx]

Supplementary Figure S1. PRISMA flowchart of included studies.

**Identification of studies via other methods**

**Identification of studies via databases and registers**

Records identified from:

Grey literature sources (n = 0)

Citation searching (n = 2)

Records removed *before screening*:

Duplicate records removed (n = 1389)

Records identified from:

Databases (n = 2185)

Registers (n = 48)

**Identification**

Records screened

(n = 844)

Records excluded

(n = 831)

Reports not retrieved

(n = 0)

Reports sought for retrieval

(n = 2)

Reports sought for retrieval

(n = 13)

Reports not retrieved

(n = 0)

**Screening**

Reports assessed for eligibility

(n = 2)

Reports excluded (n = 2)

Reports assessed for eligibility

(n = 13)

Reports excluded (n=8):

Wrong study design (n = 3)

Wrong intervention or control (n = 5)

Studies included in review

(n = 5)

Reports of included studies

(n = 5)

**Included**

Supplementary Figure S2. Quality assessment of included trials.


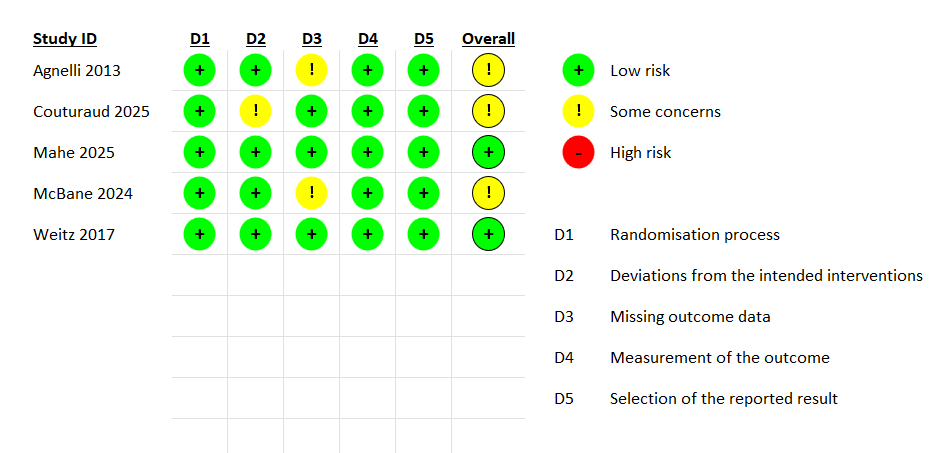


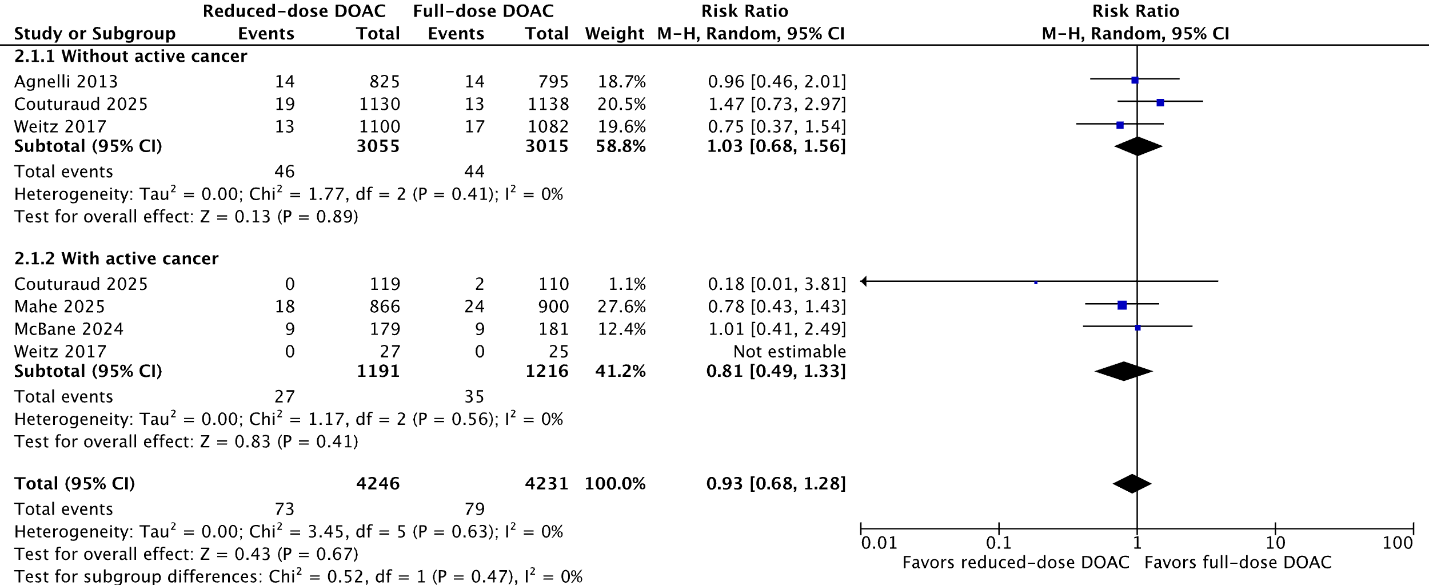


Figure S3: Reduced-dose DOAC vs Full-Dose DOAC. Outcome: Recurrent VTE. Subgroup: cancer status.


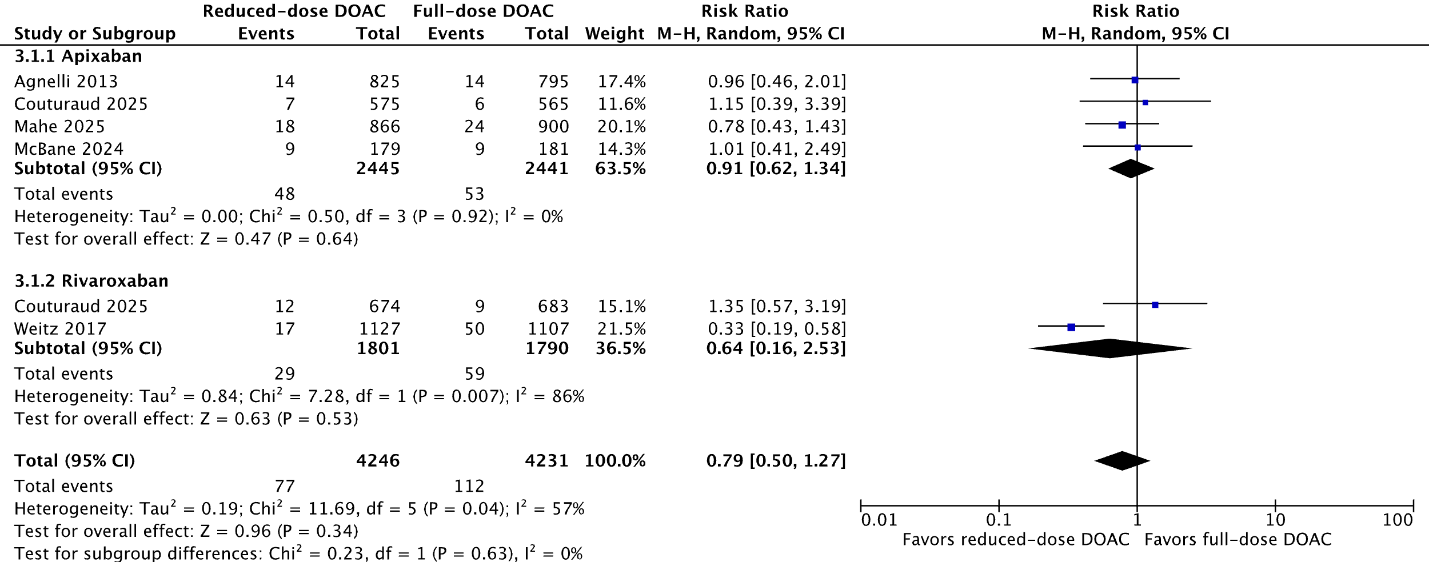


Figure S4: Reduced-dose DOAC vs Full-Dose DOAC. Outcome: Recurrent VTE. Subgroup: Type of DOAC.


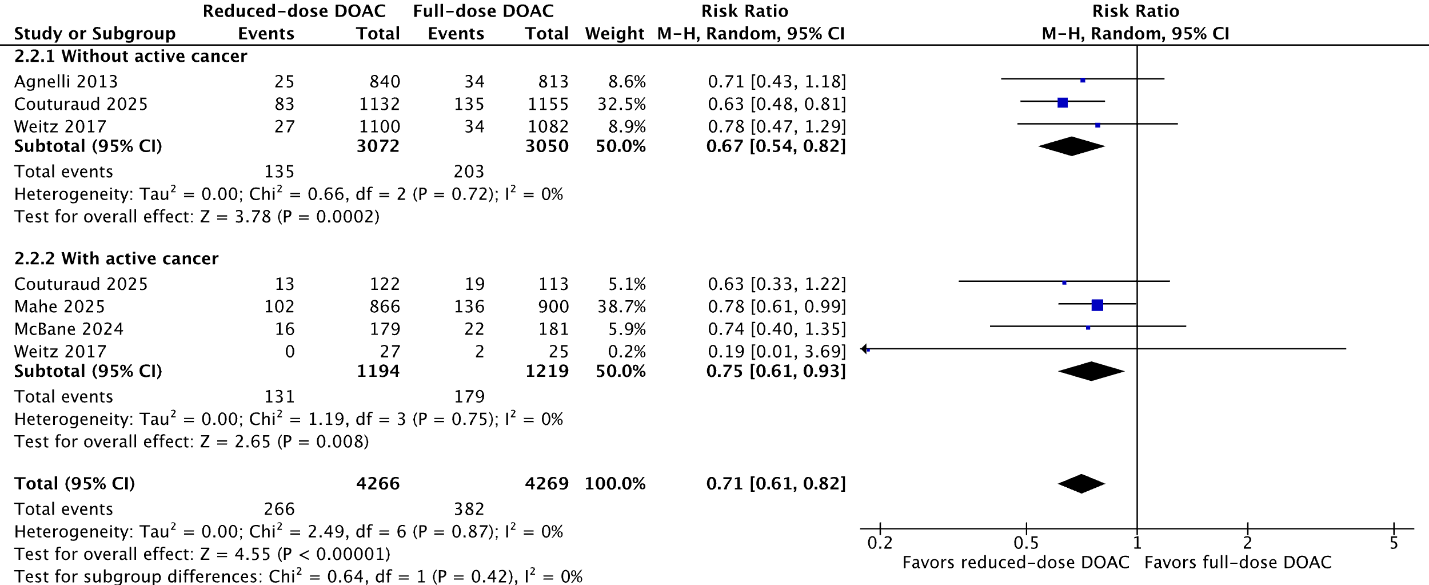


Figure S5: Reduced-dose DOAC vs Full-Dose DOAC. Outcome: Major or clinically relevant non-major bleeding. Subgroup: cancer status.


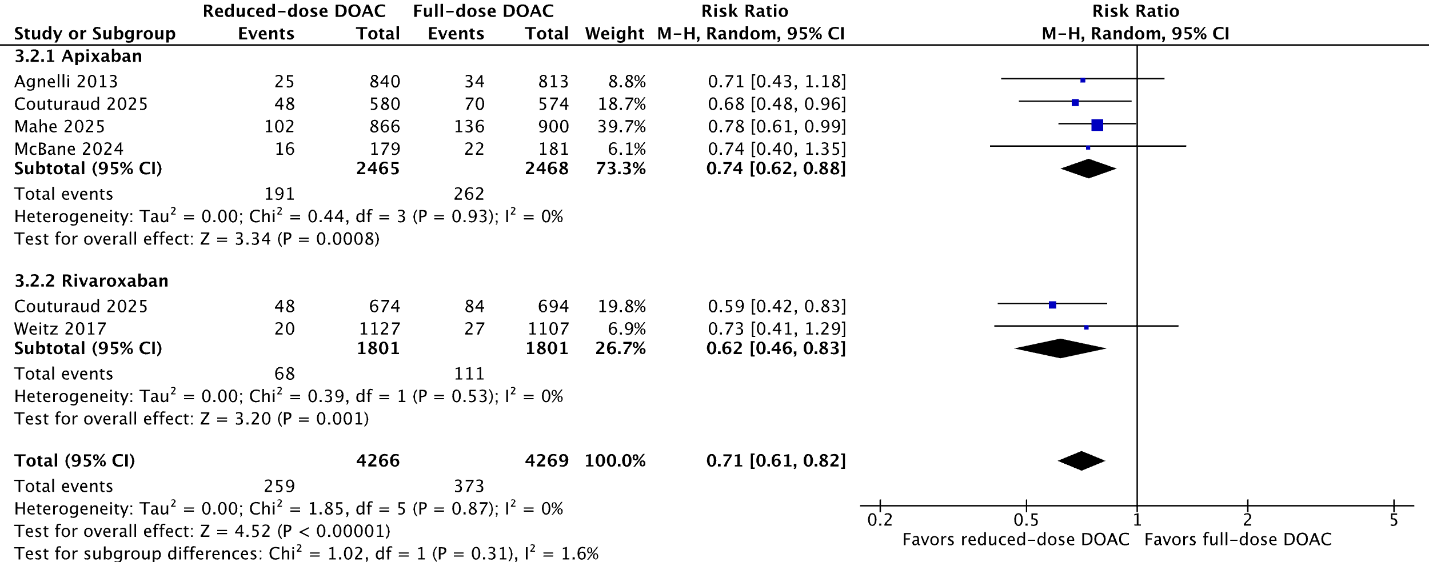


Figure S6: Reduced-dose DOAC vs Full-Dose DOAC. Outcome: Major or clinically relevant non-major bleeding. Subgroup: Type of DOAC.


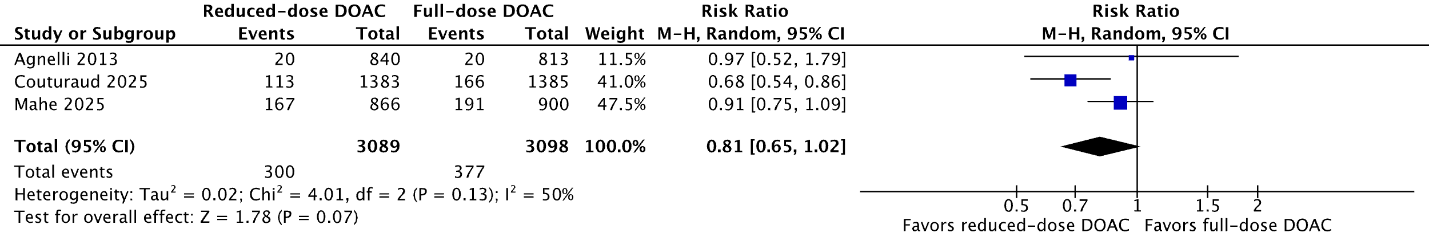


Figure S7: Reduced-dose DOAC vs Full-Dose DOAC. Outcome: Net clinical benefit


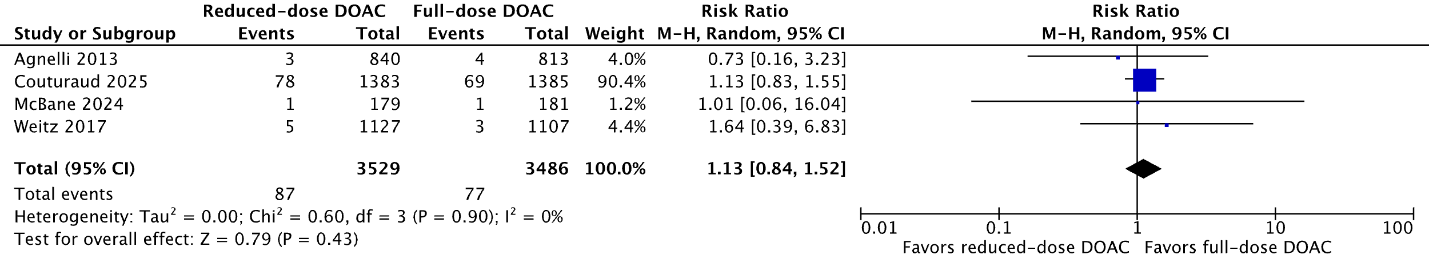


Figure S8: Reduced-dose DOAC vs Full-Dose DOAC. Outcome: Arterial thromboembolism


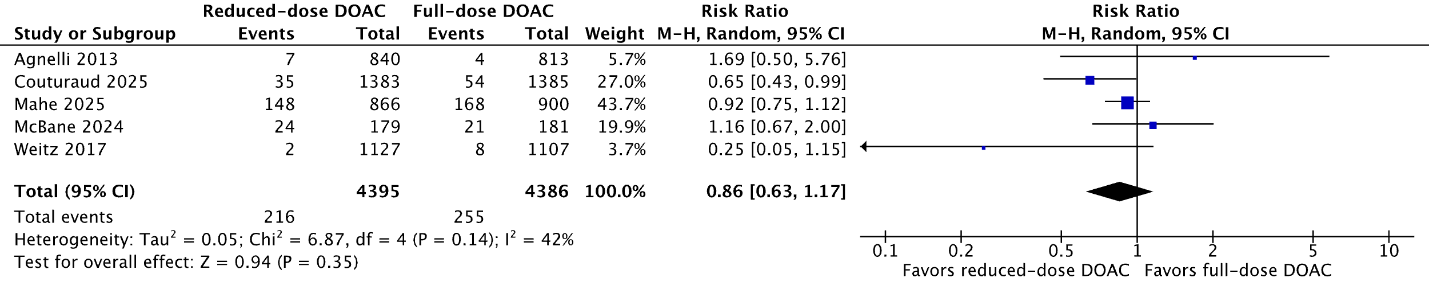


Figure S9: Reduced-dose DOAC vs Full-Dose DOAC. Outcome: All-Cause Mortality
